# Supplementary material for: Low-dimensional copper(ii) complexes triply bridged with azide/carboxylate/DMSO showing very strong ferromagnetic interaction and influence of dipolar fields at low temperatures: a quantum Monte Carlo magnetic study
Source: Royal Society of Chemistry journal article supplement (doi:10.1039/b716291j), 2008-01-01
Supplement: b716291j.pdf [file b716291j.pdf]

Supplementary Information

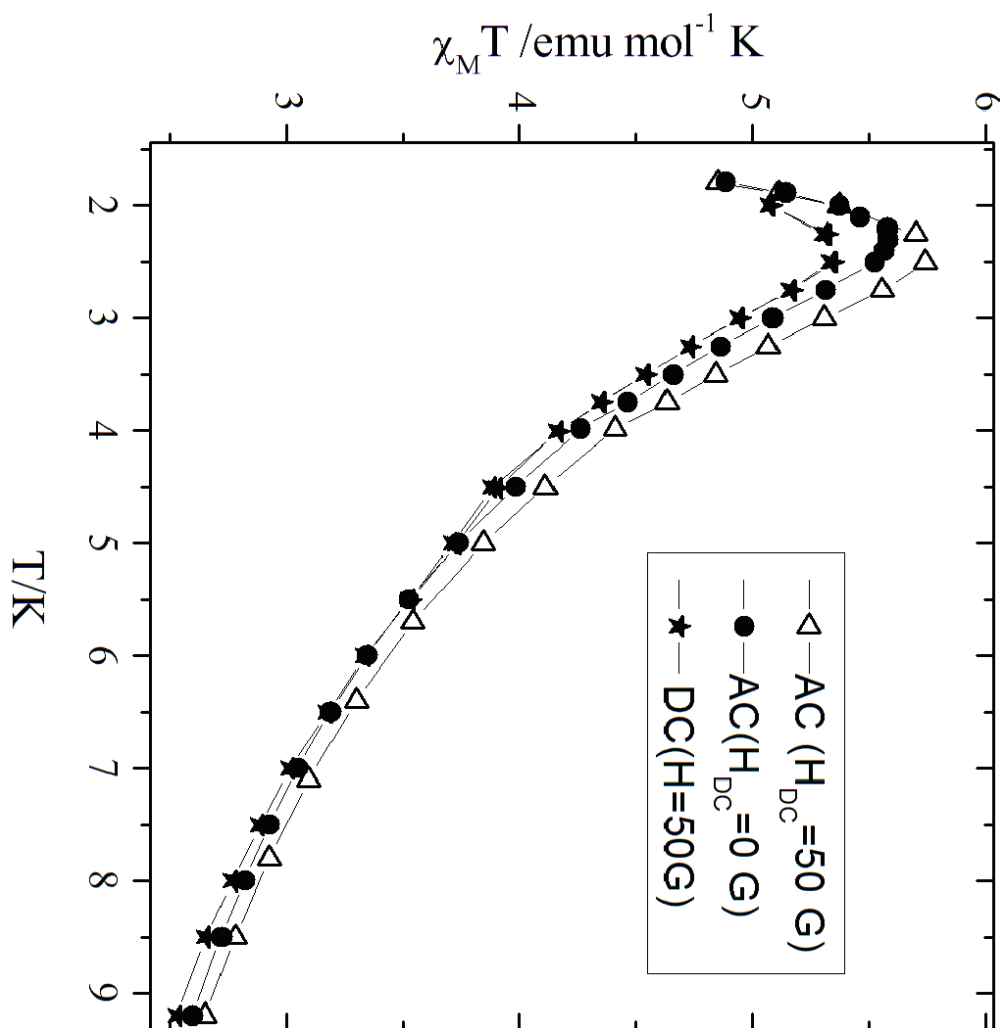

**Figure 1S.** Low temperature dependence of the magnetic susceptibility data of the **2** compound, in the form of  $\chi_M T$  vs.  $T$  from different experimental procedures: AC measurements under 0 G (solid cycles) , 50 G (open triangle) and DC measurement with the field cooling procedure at 50 G (solid stars).
